# Supplementary material for: Effectiveness and safety of follitropin alfa (Ovaleap®) for ovarian stimulation using a GnRH antagonist protocol in real-world clinical practice: a multicenter, prospective, open, non-interventional assisted reproductive technology study
Source: Springer Nature journal article supplement (doi:10.1186/s12958-020-00610-2), 2020-05-26
Supplement: MOESM1 [file 18016022]

# Fragebogen\* zur Bewertung des Ovaleap<sup>®</sup>-Pens

Name der Patientin: \_\_\_\_\_

Sehr geehrte Patientin,  
bitte beantworten Sie alle nachfolgenden Fragen zum Ovaleap<sup>®</sup>-Pen und **kreuzen jeweils nur eine Antwortmöglichkeit an**. Der ausgefüllte Fragebogen verbleibt bei Ihrem Arzt / Ihrer Ärztin. Für Auswertung der Studie werden Ihre Antworten mit einer Patientennummer jedoch ohne Angabe Ihres Namens in elektronische Datenträger übertragen. Vielen Dank für Ihre Mitarbeit.

1. Wie sicher waren Sie sich, dass Sie die Tagesdosis der Medikaments genau eingestellt haben?

Sehr sicher                       Sicher                       Unsicher

2. Wie sicher waren Sie sich, dass Sie die richtige Tagesdosis des Medikaments gespritzt haben?

Sehr sicher                       Sicher                       Unsicher

3. Wie leicht waren die schriftlichen Anweisungen zur Anwendung des Pens zu verstehen?

Sehr leicht                       Leicht                       Nicht leicht

4. Wie oft haben Sie den / die Mitarbeiter(in) im Studienzentrum darum gebeten, die Verabreichung der Tagesdosis zu erklären?

Mehr als 4-mal                       4-mal                       3-mal  
 2-mal                       1-mal                       Nie

5. Wie würden Sie die allgemeine Benutzerfreundlichkeit des Pens auf einer Skala von 1 bis 10 bewerten, wobei "1" ganz leicht und "10" ganz schwierig bedeutet?

1      2      3      4      5      6      7      8      9      10  
 |  |  |  |  |  |  |  |  |

6. Wie praktisch war die Verabreichung der Studienmedikation mittels Pen für Sie?

Sehr praktisch                       Praktisch                       Unpraktisch

7. Wie zufrieden waren Sie mit der Verabreichung der Studienmedikation mittels Pen?

Sehr zufrieden                       Zufrieden                       Unzufrieden

\*Fragebogen modifiziert nach Somkuti (2006):

*Somkuti SG, Schertz JC, Moore M et al. Patient experience with follitropin alfa prefilled pen versus previously used injectable gonadotropins for ovulation induction in oligoanovulatory women. Current Medical Research and Opinion 2006; (10):198196.*
