# Supplementary material for: Effectiveness and safety of follitropin alfa (Ovaleap®) for ovarian stimulation using a GnRH antagonist protocol in real-world clinical practice: a multicenter, prospective, open, non-interventional assisted reproductive technology study
Source: Springer Nature journal article supplement (doi:10.1186/s12958-020-00610-2), 2020-05-26

# Effectiveness and safety of follitropin alfa for ovarian stimulation using a GnRH antagonist protocol in real-world clinical practice: a multicenter, prospective, open, non-interventional assisted reproductive technology study

Peter Sydow, Norbert Gmeinwieser, Katrin Pribbernow, Christoph Keck, Inka Wiegratz

## Additional File 2. Patient disposition.

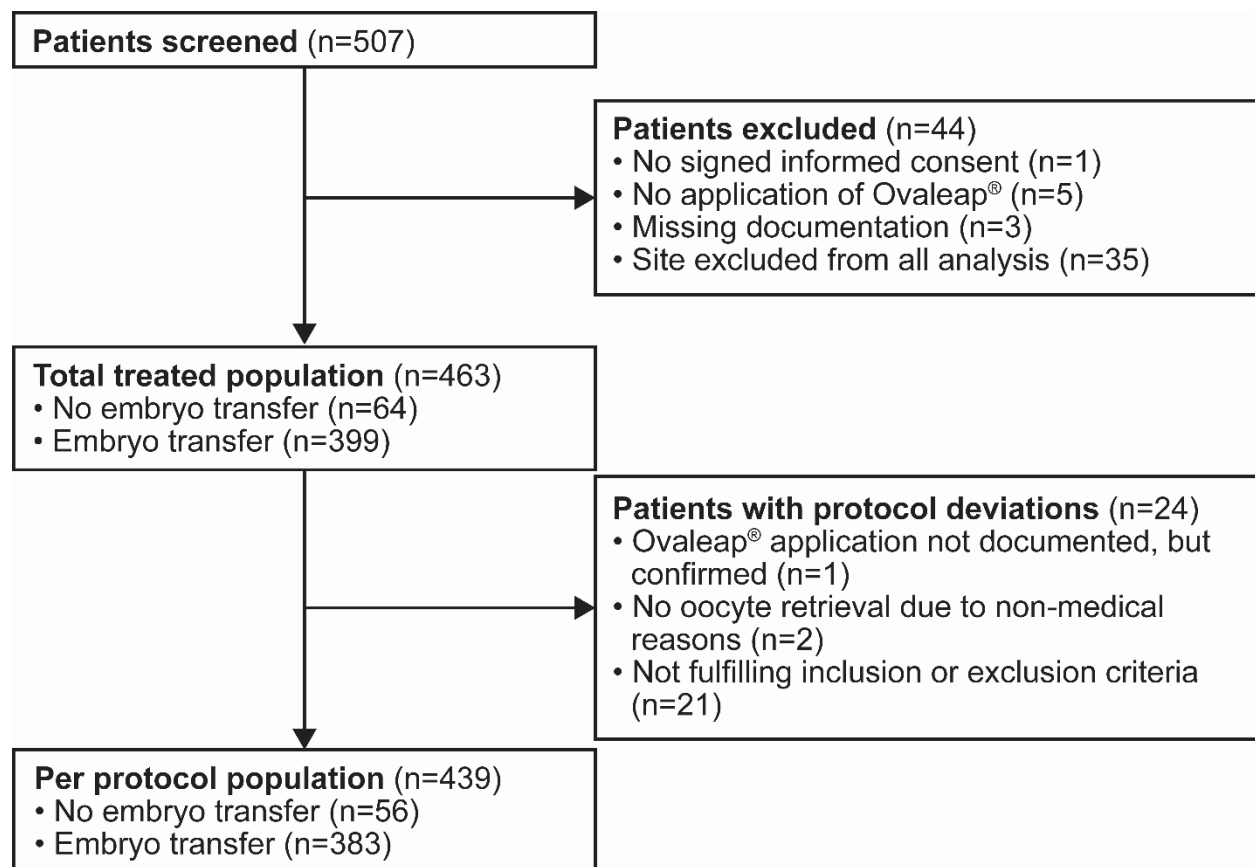

Supplement: MOESM2 [file 18016022]
